# Supplementary material
Source: Springer Nature journal article supplement (https://www.springermedizin.de/resource/supplementary/13006_2010_109_MOESM1_ESM.pdf/9627990)
Supplement: MOESM1 [file 9627990]

| Categories and subcategories                                                                                                                                                                       | Theme                                                                                    |
|----------------------------------------------------------------------------------------------------------------------------------------------------------------------------------------------------|------------------------------------------------------------------------------------------|
| <p><b>The unique woman</b></p> <ul style="list-style-type: none"> <li>- Confirmation as a person and as a breastfeeding woman</li> <li>- Support to women, whether breastfeeding or not</li> </ul> | <p><b>Individualized breastfeeding support increases confidence and satisfaction</b></p> |
| <p><b>The sensitive confirming process</b></p> <ul style="list-style-type: none"> <li>- Observation</li> <li>- Confirmation, practical and physical support</li> </ul>                             |                                                                                          |
| <p><b>Continuity of ongoing support</b></p> <ul style="list-style-type: none"> <li>- Establish continuity</li> <li>- Follow-up</li> </ul>                                                          |                                                                                          |

**Figure 1** Categories with subcategories and theme identified from interviews with women and midwives.
